# Supplementary material for: Live-tracking of beef freshness by sub-ppb level ammonia detection using WS2/rGO nanoflakes incorporating edge site-enriched acidic sulfur
Source: Royal Society of Chemistry journal article supplement (doi:10.1039/d3ta07831k), 2024-01-01
Supplement: d3ta07831k1.pdf [file d3ta07831k1.pdf]

1

## Supporting Data

2 **Live-tracking of beef freshness at sub-ppb level ammonia detection with synergistic**  
3 **advancement in WS<sub>2</sub>/rGO nanoflakes by edge site enriched acidic sulfur**

4

5 *Sonam Sonwal<sup>a</sup>, Kugalur Shanmugam Ranjith<sup>b</sup>, Subin Han<sup>a</sup>, Young-Kyu Han<sup>b,\*</sup>, Mi-Hwa Oh<sup>c,\*</sup>*

6 *Yun Suk Huh<sup>a,\*</sup>*

7

8 *<sup>a</sup>NanoBio High-Tech Materials Research Center, Department of Biological Engineering, Inha*  
9 *University, Incheon 22212, Republic of Korea*

10 *<sup>b</sup>Department of Energy and Material Engineering, Dongguk University-Seoul, Seoul 04620,*  
11 *Republic of Korea*

12 *<sup>c</sup>National Institute of Animal Science, Rural Development Administration, Wanju 55365,*  
13 *Republic of Korea*

14

15

16

17 \* Correspondence: yunsuk.huh@inha.ac.kr (Y.S.Huh), moh@korea.kr (M.-H.Oh),

18 ykenergy@dongguk.edu (Y.-K.Han)

19

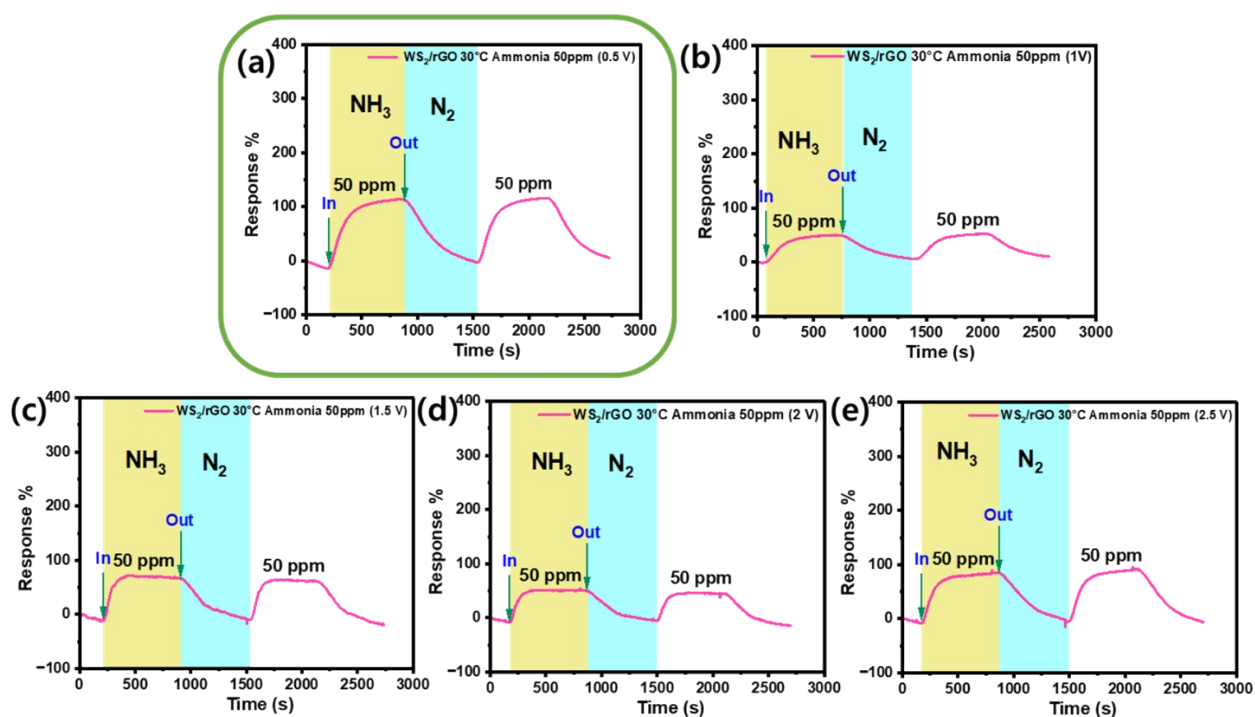

20

21 **Fig. S1.** Comparison of sensing performance of WS<sub>2</sub>/rGO composite at different applied voltage.

22 (a) 0.5V. (b) 1V. (c) 1.5V. (d) 2V. (e) 2.5V.

23

24 The sensor's response as functions of the provided bias voltage. At 0.5 V, the response rises to 120

25 (a), and at 2.5 V, it falls by 30 (e). The recovery also declines, going from 662 seconds at 0.5 V to

26 133 seconds at 1 V and finally to 377 seconds at 2.5 V. These findings are highly intriguing given

27 that optimizing the applied voltage alone significantly improves sensing performance of the

28 sensing electrode. Sensing response at 0.5 V showed the best response and recovery in comparison

29 to the rest of the four volts, as represented in (a). Also, 0.5 V operating voltage supports our

30 wireless device to be operated based on a coin cell.

31

32 The performance of a p-type semiconductor is significantly influenced by the exact location of the  
33 Fermi level. A crucial factor since it has a significant impact on the thermal, electrical, and,  
34 ultimately, functional characteristics of a semiconductor device. In p-type semiconductors, a closer  
35 Fermi level to the valence band results in more holes, which influence the behavior of the  
36 semiconductor as a whole because they are the majority carrier. A semiconductor is classified as  
37 p-type if its Fermi level is closer to the valence band and as n-type if it is closer to the conduction  
38 band. The application of an external voltage can alter this flow of holes or electrons, permitting  
39 the change in flow of current (positive or negative) and as applied voltage increases the  
40 conductivity decreases (hole-electron pair) and sensing response decreases. That said, the Fermi  
41 level positioning isn't static. The number of hole-electron pairs enhances, the Fermi level also  
42 moves towards the center of the bandgap, becoming intrinsic (less presence of electron in p-type  
43 semiconductors). The increase in intrinsic carriers alters the carrier distribution and thus affects  
44 the device's operation. As a result, in presence of ammonia additional electrons adsorbs on the  
45 surface having less holes (less conduction) leading to the accumulation of electrons over the  
46 surface or in other words less holes are available to interact with ammonia donated electrons, hence  
47 enhancing the conductivity of the material (high electron density, influencing the nature of p-type  
48 semiconductor) due to which at high voltage, low response resistance was observed.<sup>1-4</sup>

49

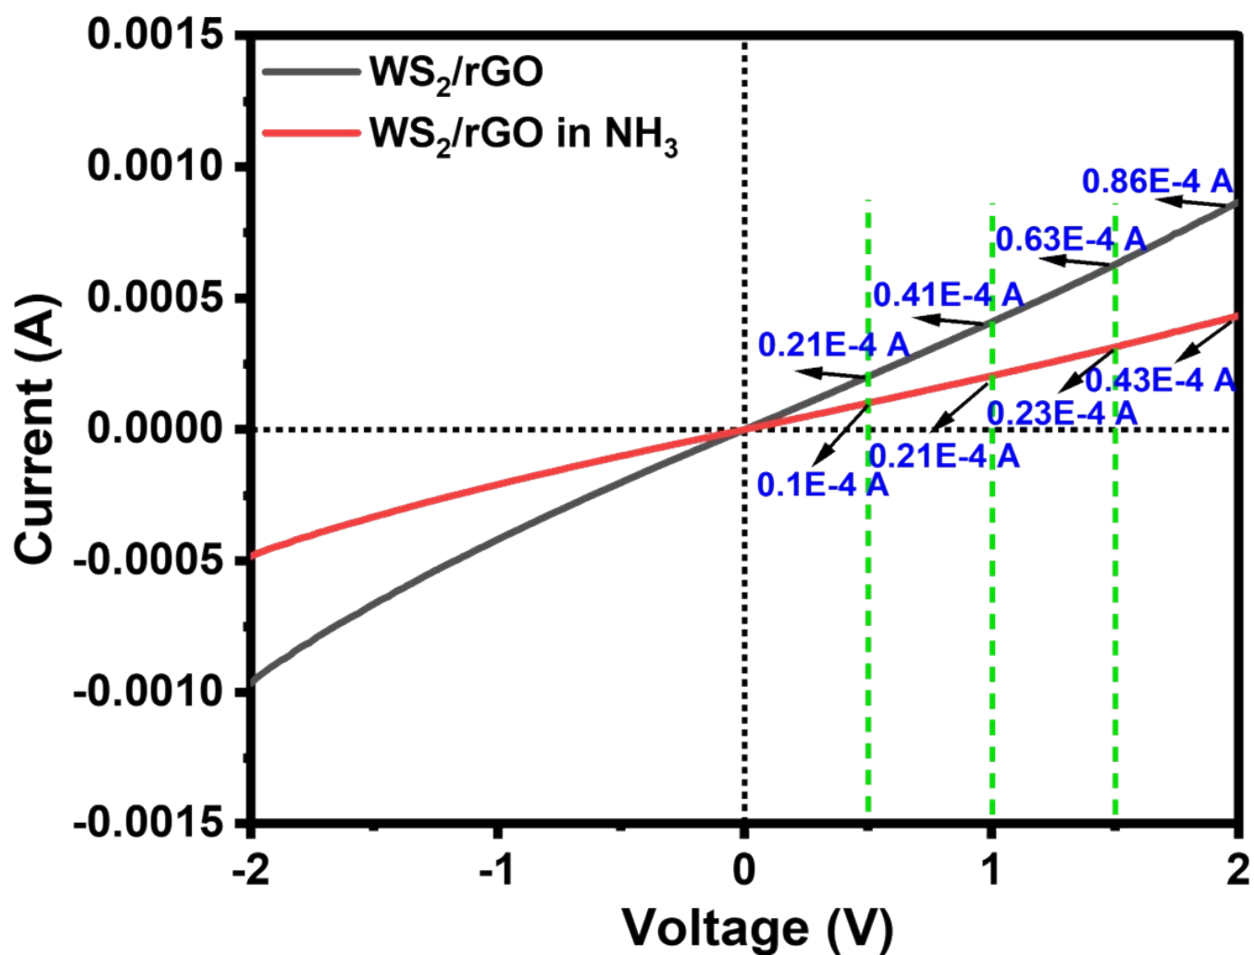

50

51 **Fig. S2.** I-V study for WS<sub>2</sub>/rGO composite in presence and absence of NH<sub>3</sub>.

52 I-V curve revealed that upon increasing voltage the current intensity also increased in presence of  
 53 air and in presence of NH<sub>3</sub> same trend was observed but the current intensity is lower as compared  
 54 to air environment. So, as the resistance is increasing it is supporting the sensing mechanism, for  
 55 this reason we have chosen low voltage-high resistance parameter. Furthermore, our objective is  
 56 to operate a commercial device so we have targeted low energy consumption which will be suitable  
 57 for a coin cell-based device.

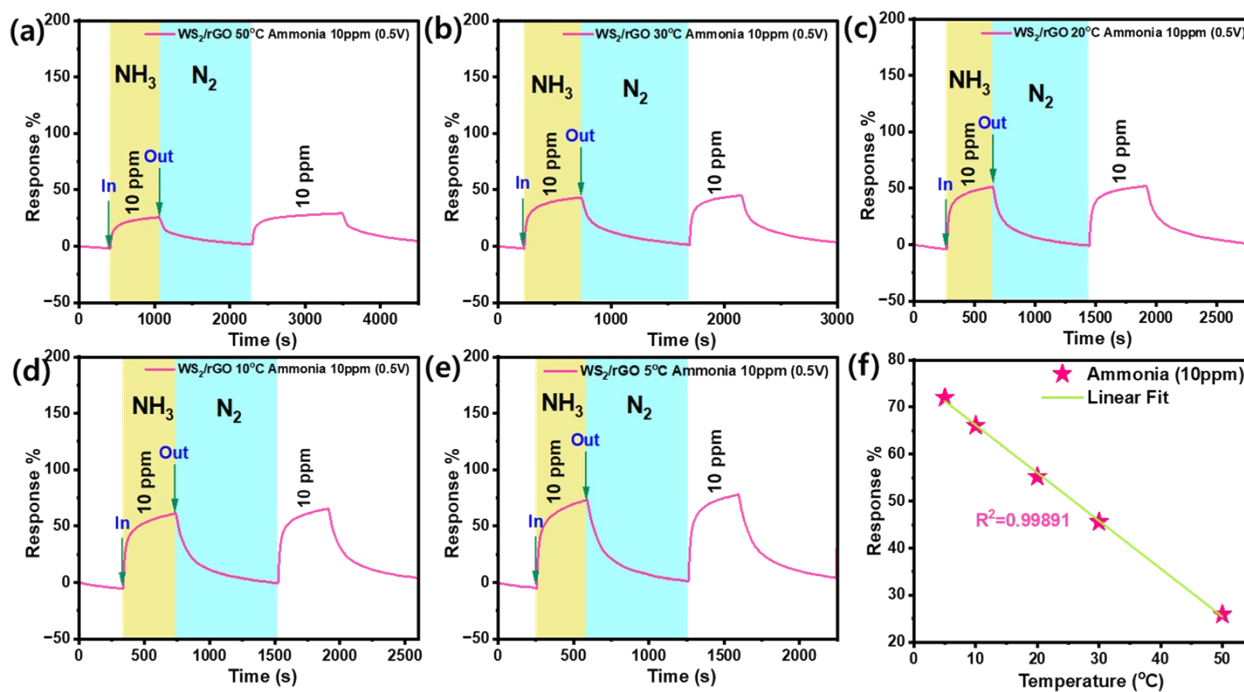

58

59 **Fig. S3.** Comparison of sensing performance of WS<sub>2</sub>/rGO composite at different temperatures. (a)  
 60 50°C. (b) 30°C. (c) 20°C. (d) 10°C. (e) 5°C.

61

62 Temperature dependent study for the optimization of working temperature. Sensing response is  
 63 inversely proportional to the temperature, on decreasing temperature the sensor showed more  
 64 higher response. (b) According to the real-time monitoring target we operated all experiments at  
 65 30°C. (f) The relationship between temperature and response showed a linear trend with an R<sup>2</sup>  
 66 value of 0.99891.

67

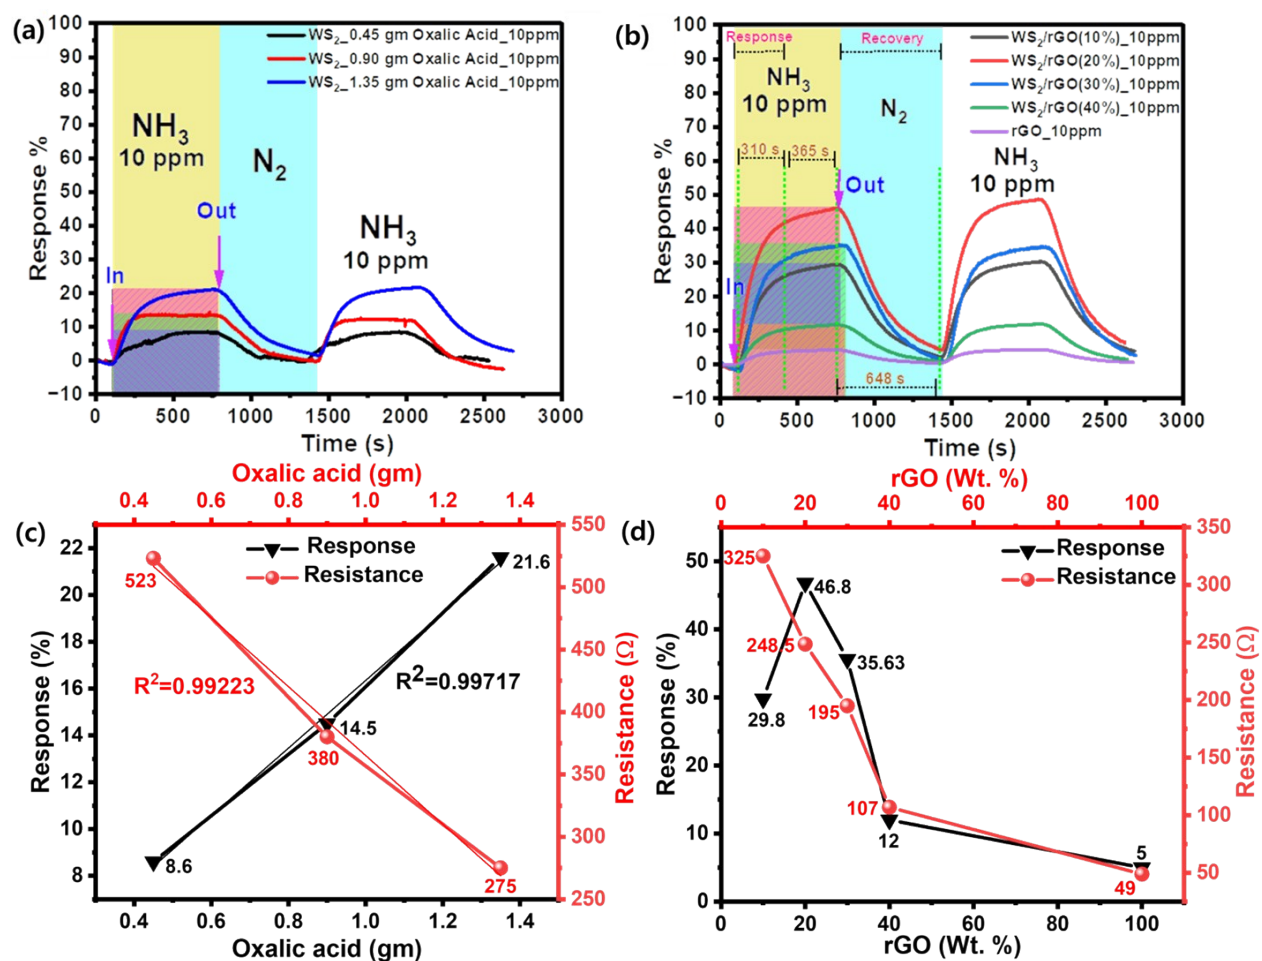

68

69 **Fig. S4.** Optimization of OA content and rGO content. (a) Sensing response comparison of  $WS_2$   
 70 with different OA content. (b) Sensing response comparison of  $WS_2/rGO$  with different rGO  
 71 content. (c) Linear fit of sensing response and resistance of  $WS_2$  with different OA content. (d)  
 72 linear fit for sensing response and resistance comparison of  $WS_2/rGO$  with different rGO content.  
 73

74 Oxalic acid content and rGO wt. % optimization for best performance of the sensor. (a and c)  
 75 Sensing response is proportional to the oxalic acid concentration, on increasing oxalic acid (1.35  
 76 gm) amount the sensor showed higher response, showed linear trend with  $R^2$  vale of 0.99717. (b

77 and d) 20 wt. % of rGO compared to 100 wt. %, 10 wt. %, 30 wt. %, and 40 wt. %, showed highest  
78 sensing response towards  $\text{NH}_3$  at RT.  
79

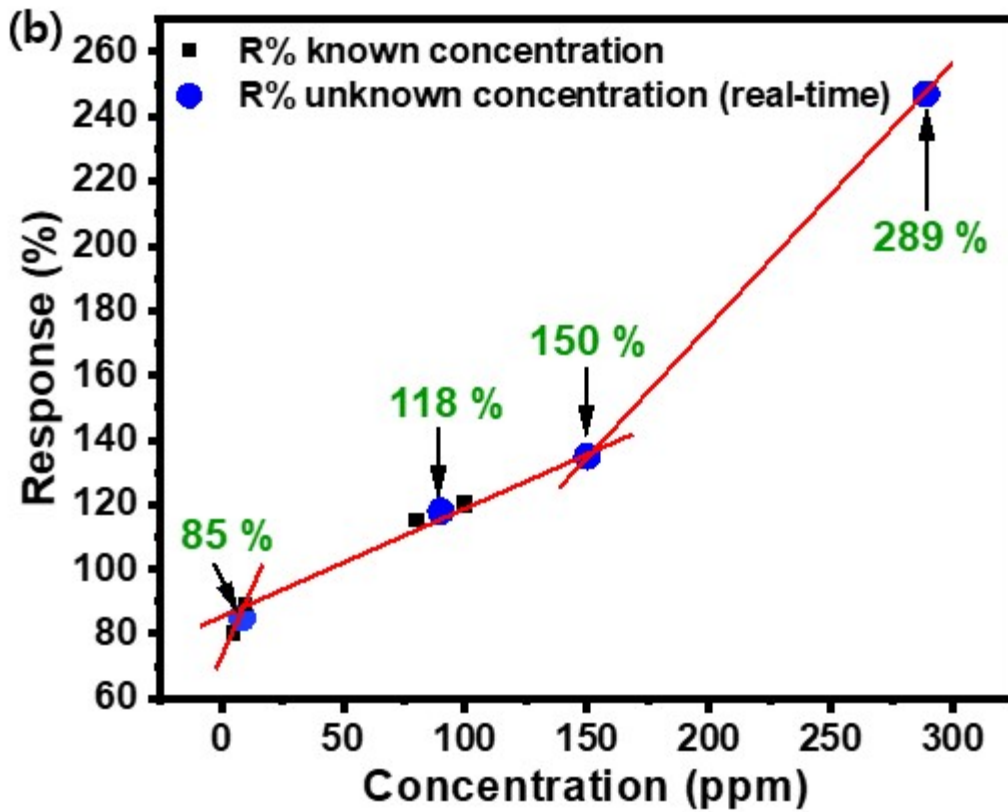

80

81 **Fig. S5.** Real-time monitoring sensor response % towards different concentration of NH<sub>3</sub> during  
 82 meat spoilage. Comparison and calculation of unknown concentration of NH<sub>3</sub> during meat spoilage  
 83 to set the admissible range for meat freshness. Below 150 response % meat is admissible to  
 84 consume.

85



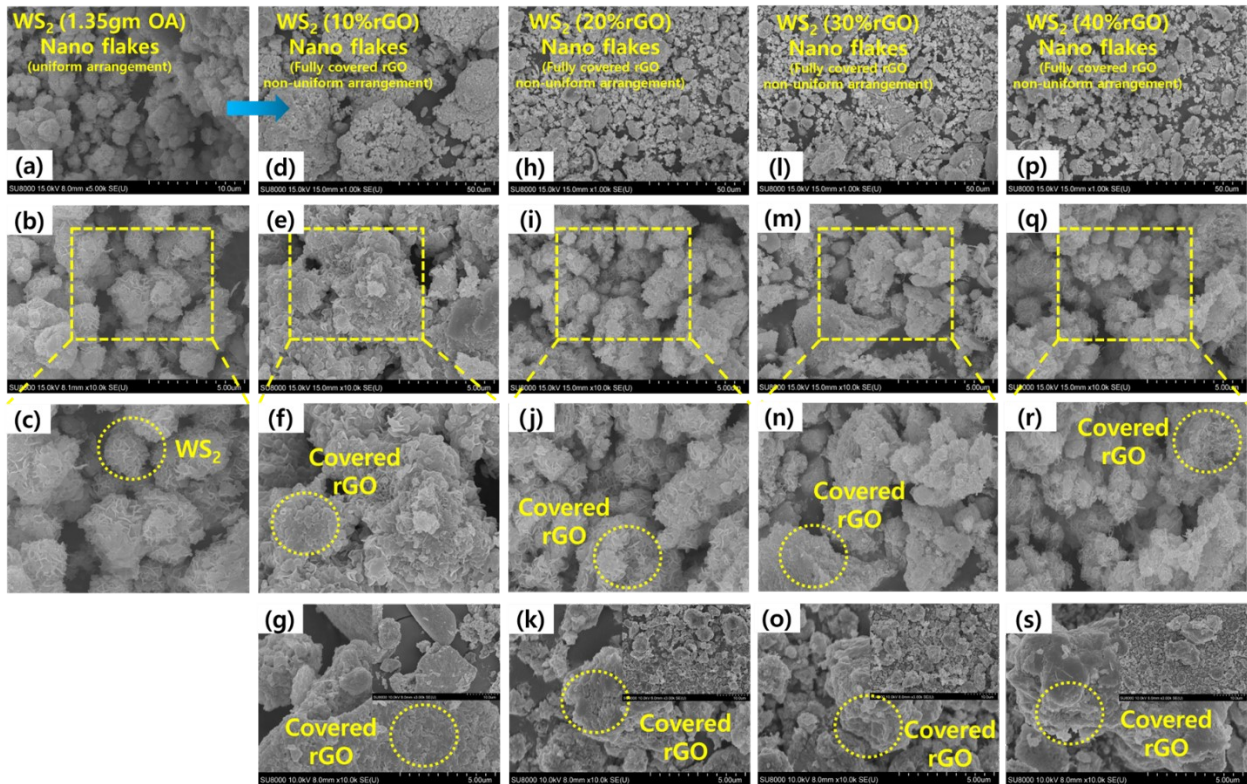

86

87 **Fig. S6.** HRSEM images of pristine WS<sub>2</sub> and all four composites at different magnifications to  
 88 showcase the presence of rGO in all composites and their structural modifications. (a-c) WS<sub>2</sub>. (d-  
 89 g) WS<sub>2</sub> (10% rGO). (h-k) WS<sub>2</sub> (20% rGO). (l-o) WS<sub>2</sub> (30% rGO). (p-s) WS<sub>2</sub> (40% rGO).

90 HRSEM is used to examine the microstructure and morphology of all four composites. HRSEM  
 91 images at various magnifications are shown in Fig. S6a-s. Synthesized sulfur-rich WS<sub>2</sub>/rGO  
 92 composites were primarily composed of nanoflakes (Fig. S6f,j,n, and r). High-magnification SEM  
 93 (Fig. S6f,j,n, and r) revealed details of the microstructure of WS<sub>2</sub> nanoflakes and showed that they  
 94 homogeneously and completely decorated rGO. Furthermore, the presence of rGO is shown in fig.  
 95 S6g,k,o, and s, which represents that the morphology is disrupting over the addition of high rGO  
 96 content (10%, 20%, 30%, and 40%) simultaneously maintaining the homogenous covering of all  
 97 rGO particles.

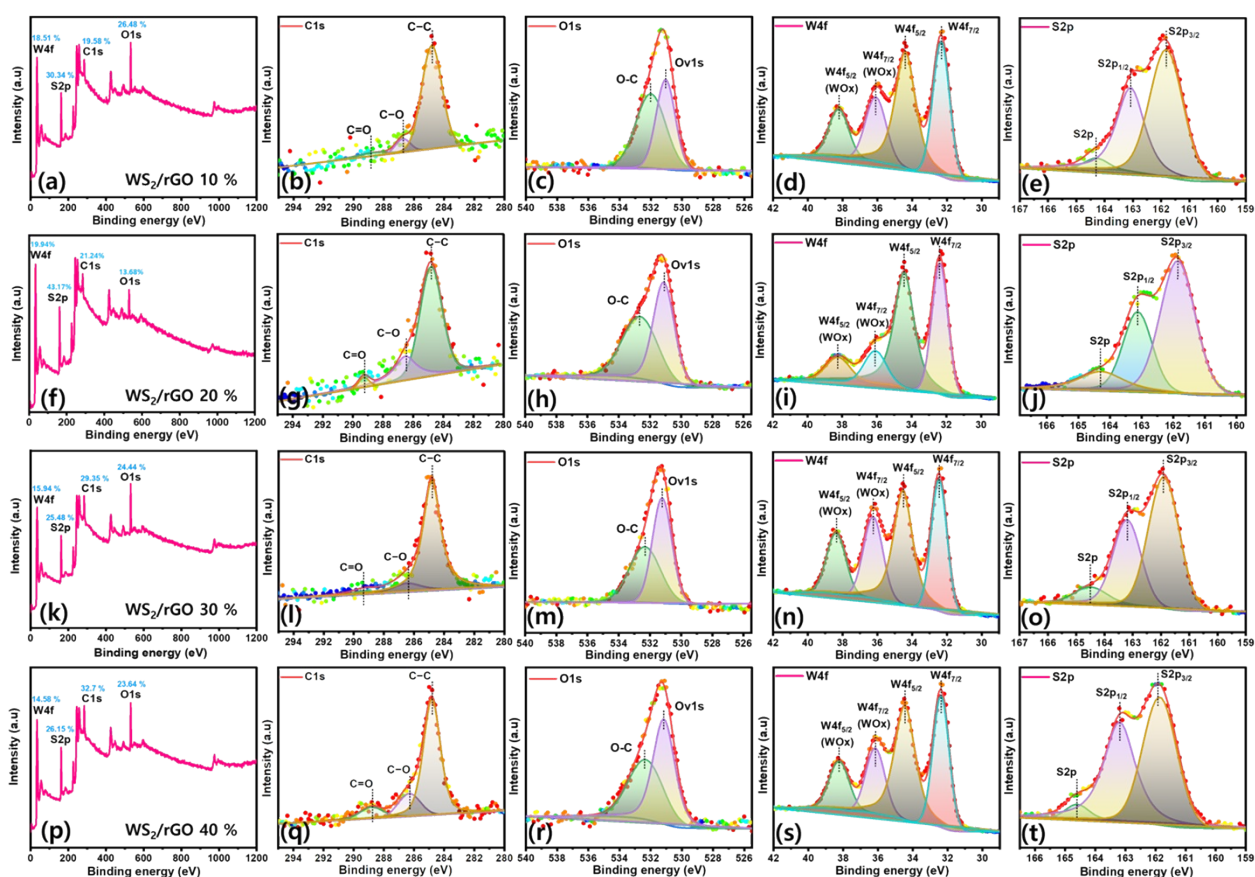

98

99 **Fig. S7.** XPS survey spectra of all four sulfur-rich WS<sub>2</sub>/rGO composite; (a) WS<sub>2</sub> (10% rGO). (f)  
 100 WS<sub>2</sub> (20% rGO). (k) WS<sub>2</sub> (30% rGO). (p) WS<sub>2</sub> (40% rGO) full scan survey spectra. (b-e) C1s,  
 101 O1s, W4f, and S2p for WS<sub>2</sub> (10% rGO) composite. (g-j) C1s, O1s, W4f, and S2p for WS<sub>2</sub> (20%  
 102 rGO) composite. (l-o) C1s, O1s, W4f, and S2p for WS<sub>2</sub> (30% rGO) composite. (q-t) C1s, O1s,  
 103 W4f, and S2p for WS<sub>2</sub> (40% rGO) composite.

104

105 XPS analysis was performed to classify the molecular phases and oxidation states in all four  
 106 different compositions of composites to evaluate the content ratio of all samples. The four core  
 107 level peaks for W 4f, S 2p, C 1s, and O 1s are presented in (Fig. S7a,f,k and p) for all four samples  
 108 (WS<sub>2</sub>/rGO-10%, 20%, 30% and 40%), the percentage of carbon has increased with increase in

109 rGO content, the best performed composition with 20% rGO showed the least O<sub>2</sub> presence and  
110 highest W and S presence among all four compositions. The three core functional peaks at 284.8  
111 eV (C-C), 286.4 eV (C-O), and 289.2 eV (C=O) represent C bonding (Fig. S7b,g,l, and q) and  
112 depict the C 1s deconvoluted spectrum of the sulfur-rich WS<sub>2</sub>/rGO composites. Less intense O-  
113 bond signals in the C 1s spectrum of the composite further support its lower O-content.  
114 Observation of less O 1s state in the WS<sub>2</sub>/rGO nanohybrids showed that the hydrothermal  
115 procedure effectively reduced GO to rGO. Fig. S7c,h,m, and r, shows the O 1s information, in  
116 which the main peak of O at 531.11 eV implies the existence of O-W bond in WS<sub>2</sub>/rGO  
117 composites. In addition, a small peak at 532.65 eV is attributed to the sub-stoichiometric form of  
118 WS<sub>2</sub>/rGO composites. The binding energies of two satellite shakeup peaks at 32.39 and 34.42 eV  
119 (Fig. 5d,i,n, and s) showed W 4f<sub>7/2</sub> and W 4f<sub>5/2</sub> are distinguishing features. Simultaneously, the  
120 modest peaks at 36.11 and 38.24 eV were attributed to W 4f<sub>7/2</sub> and W 5p<sub>3/2</sub> of oxides originating  
121 from WO<sub>x</sub> and higher binding energies on the surface of the as-prepared sulfur-rich composites,  
122 notably 20% rGO ratio showed the least “O<sub>2</sub>” presence with least intense peaks at 36.11 and 38.24  
123 eV. Fig. S7e,j,o, and t, depicts the spectrum of S 2p, the binding energies of peaks at 161.86,  
124 163.13 eV, and 164.29 eV denote divalent sulfide ions of S 2p<sub>3/2</sub>, S 2p<sub>1/2</sub>, and S 2p orbitals,  
125 respectively, used for W-S bonding. This shows the existence of unsaturated sulfur, and no S-O  
126 interaction peak was observed which supports the sensing mechanism or best performing  
127 composition (WS<sub>2</sub>/rGO 20%). A possible site for humidity (RH) interaction. Two fundamental S  
128 2p<sub>1/2</sub> and S 2p<sub>3/2</sub> peaks represent the common orbital states of S electrons. S has a valence of -2 in  
129 WS<sub>2</sub> and is represented by a pair of S 2p<sub>1/2</sub> and S 2p<sub>3/2</sub> peaks. Because of the possibility that the  
130 existence of sulfonated species (-SO<sub>3</sub>H, the valence of S is +4) in the sulfur-rich WS<sub>2</sub>/rGO

131 heterojunction, acid centers may inhibit. Thus, the peak of acid centers ( $\text{SO}_4^{2-}$ , the valence of S is  
132 +6) is absent in Fig. S7e,j,o, and t. A certain rise may be seen in the area ratio between  $\text{S}2\text{p}_{1/2}$  and  
133  $\text{S}2\text{p}_{3/2}$ , which indicates an increase in  $\text{S}^{4+}$  content. With a +4 valence of the S element, it represents  
134 the existence of sulfonated species  $-\text{SO}_3\text{H}$  and sulfur richness of the composite material.

135

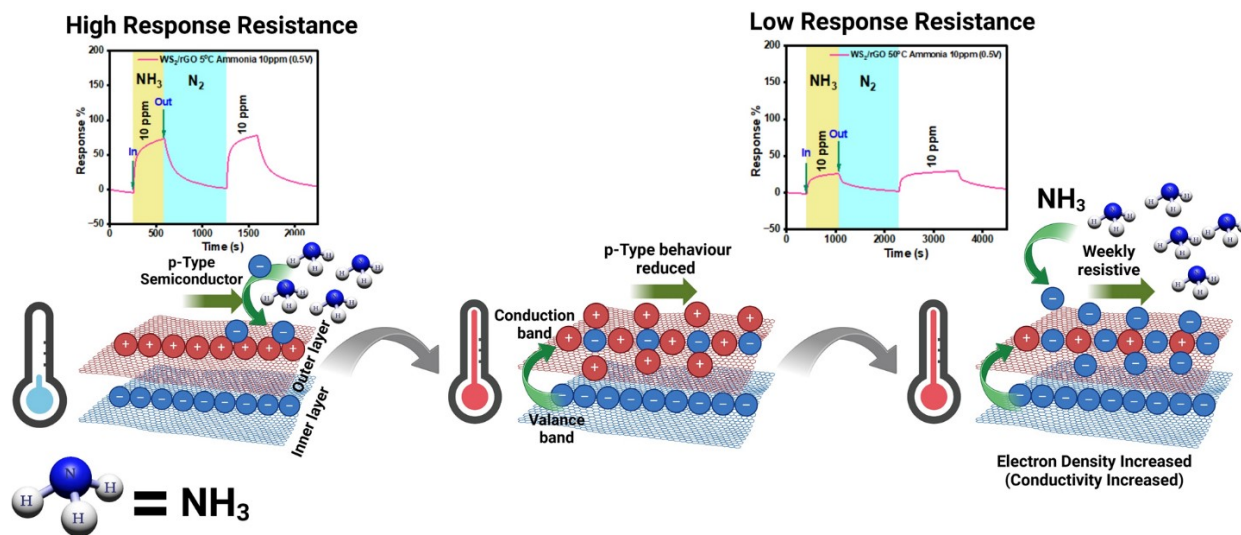

136

137 **Fig. S8.** Schematic presentation of sensing mechanism at low and high temperature.

138

139 In P-type semiconductors, the conductivity (flow of positive charge) decreases with increasing  
 140 temperature due to the decrease in number of holes. At low temperatures, the holes are highly  
 141 concentrated and act as majority charge carriers, while at the higher temperatures, thermal energy  
 142 promotes some of the holes to the valance band, reducing the number of available holes for  
 143 conduction or the intrinsic charge carrier concentration (i.e., electron-hole pair) also increases.  
 144 With more pairs, holes can recombine with electrons, reducing the rate of hole flow, and  
 145 consequently, the conductivity drops. Simultaneously, in presence of ammonia additional  
 146 electrons adsorbs on the surface having less holes (less conduction) leading to the accumulation of  
 147 electrons over the surface or in other words less holes are available to interact with ammonia  
 148 donated electrons, hence enhancing the conductivity of the material (high electron density,  
 149 influencing the nature of semiconductor) due to which at high temperature, low response resistance  
 150 was observed. This behavior can be explained by the band theory of solids. In semiconductors, the

151 valence band and conduction band are separated by a band gap, which determines the energy  
152 required for an electron to move from the valence band to the conduction band and become a free  
153 electron. At low temperatures, the electrons are mostly in the valence band, and few are able to  
154 overcome the energy barrier and enter the conduction band (nature of p-type semiconductors).  
155 However, as the temperature increases, more electrons are able to gain enough thermal energy to  
156 move into the conduction band, increasing the conductivity.<sup>4-7</sup>

157



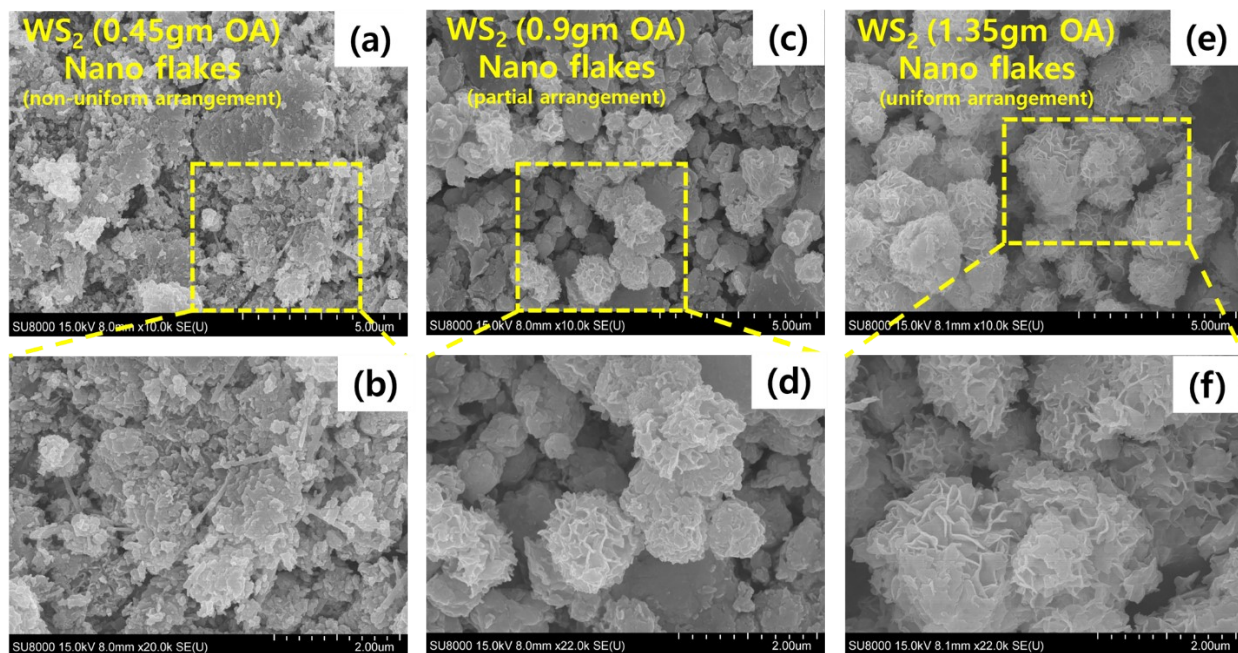

158

159 **Fig. S9.** HRSEM images of WS<sub>2</sub> with different OA content at different resolutions. (a, b) WS<sub>2</sub>  
 160 (0.45 gm OA). (c, d) WS<sub>2</sub> (0.9 gm OA). (e, f) WS<sub>2</sub> (1.35 gm OA).

161

162 HRSEM is used to examine the microstructure and morphology of all three pristine WS<sub>2</sub>  
 163 nanomaterials (Fig. S9a,c, and e). HRSEM images at high magnifications are shown in Fig. S9b,d,  
 164 and f. Synthesized sulfur-rich WS<sub>2</sub> nanomaterials were primarily composed of nanoflakes. High-  
 165 magnification of all three samples revealed details of the microstructure of WS<sub>2</sub> nanoflakes and  
 166 showed that on increasing oxalic acid (OA) content the best performed pristine nanomaterial (WS<sub>2</sub>,  
 167 1.35 gm OA) showed the perfect microstructure with homogenous formation of nanoflakes.

168

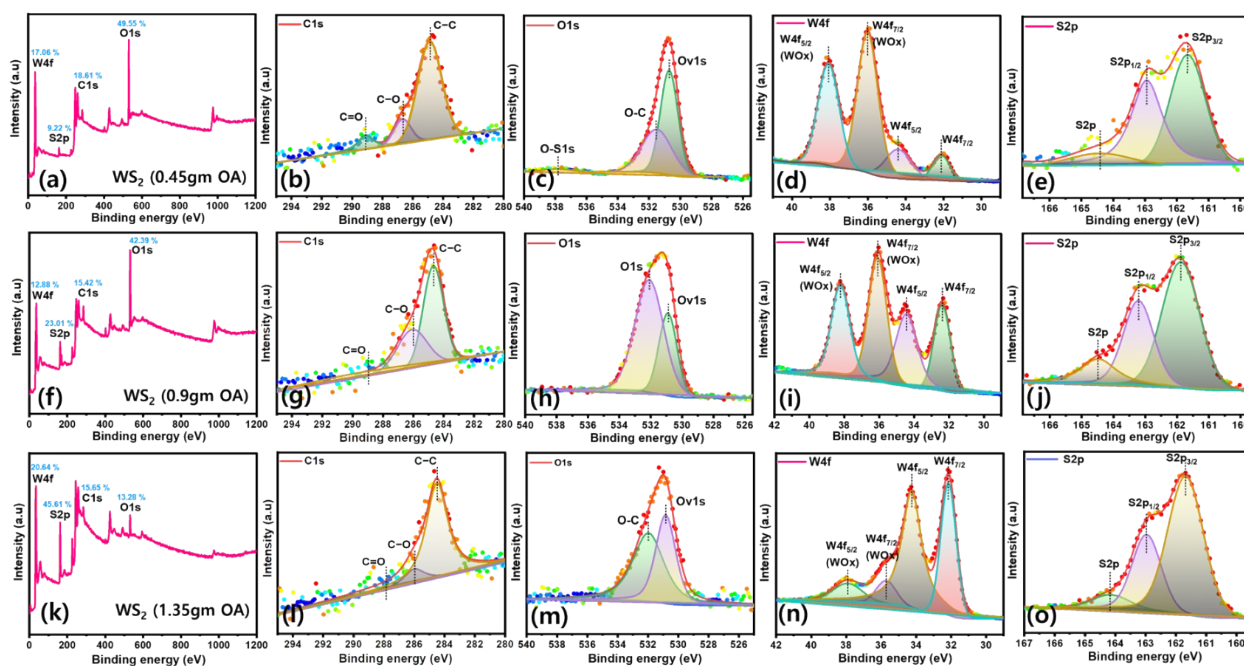

169

170 **Fig. S10.** XPS survey spectra of all three pristine WS<sub>2</sub> with different OA content; (a) WS<sub>2</sub> (0.45  
 171 gm OA). (f) WS<sub>2</sub> (0.90 gm OA). (k) WS<sub>2</sub> (1.35 gm OA). full scan survey spectra. (b-e) C 1s, O 1s,  
 172 W 4f, and S 2p for WS<sub>2</sub> (0.45 gm OA). (g-j) C 1s, O 1s, W 4f, and S 2p for WS<sub>2</sub> (0.90 gm OA). (l-o)  
 173 C 1s, O 1s, W 4f, and S 2p for WS<sub>2</sub> (1.35 gm OA).

174

175 XPS analysis was performed to classify the molecular phases and oxidation states in all three  
 176 pristine WS<sub>2</sub> samples to evaluate the effect of OA. The four core level peaks for W 4f, S 2p, C 1s,  
 177 and O 1s are presented in (Fig. S10a,f, and k) for all three samples (WS<sub>2</sub> with 0.45, 0.9, and 1.35  
 178 gm OA). The best performed pristine nanomaterial (WS<sub>2</sub> with 1.35 gm OA) showed the sulfur  
 179 richness and highest intensities of W 4f peaks at the binding energies of two satellite shakeup peaks  
 180 at 32.39 and 34.42 eV (Fig. S10n) showed W 4f<sub>7/2</sub> and W 4f<sub>5/2</sub> are distinguishing features.  
 181 Simultaneously, the modest peaks at 36.11 and 38.24 eV were attributed to W 4f<sub>7/2</sub> and W 5p<sub>3/2</sub> of  
 182 oxides originating from WO<sub>x</sub> which are least intense compared to less content of OA samples.



183 Notably presence of 1.35gm OA showed the least “O<sub>2</sub>” presence with least intense peaks at 36.11  
184 and 38.24 eV (Fig. S10k). Fig. S10e,j, and o, depicts the spectrum of S 2p, the binding energies of  
185 peaks at 161.86, 163.13 eV, and 164.29 eV denote divalent sulfide ions of S 2p<sub>3/2</sub>, S 2p<sub>1/2</sub>, and S  
186 2p orbitals, respectively, used for W-S bonding. This shows the existence of unsaturated sulfur.  
187 Two fundamental S 2p<sub>1/2</sub> and S 2p<sub>3/2</sub> peaks represent the common orbital states of S electrons. S  
188 has a valence of -2 in WS<sub>2</sub> and is represented by a pair of S 2p<sub>1/2</sub> and S 2p<sub>3/2</sub> peaks. Because of the  
189 possibility that the existence of sulfonated species (-SO<sub>3</sub>H, the valence of S is +4) in the sulfur-  
190 rich WS<sub>2</sub> heterojunction, acid centers may inhibit. Thus, the peak of acid centers (SO<sub>4</sub><sup>2-</sup>, the  
191 valence of S is +6) is absent in Fig. S7e,j, and o. A certain rise may be seen in the area ratio between  
192 S2p<sub>1/2</sub> and S2p<sub>3/2</sub>, which indicates an increase in S<sup>4+</sup> content. With a +4 valence of the S element,  
193 it represents the existence of sulfonated species -SO<sub>3</sub>H and sulfur richness of the composite  
194 material.

195

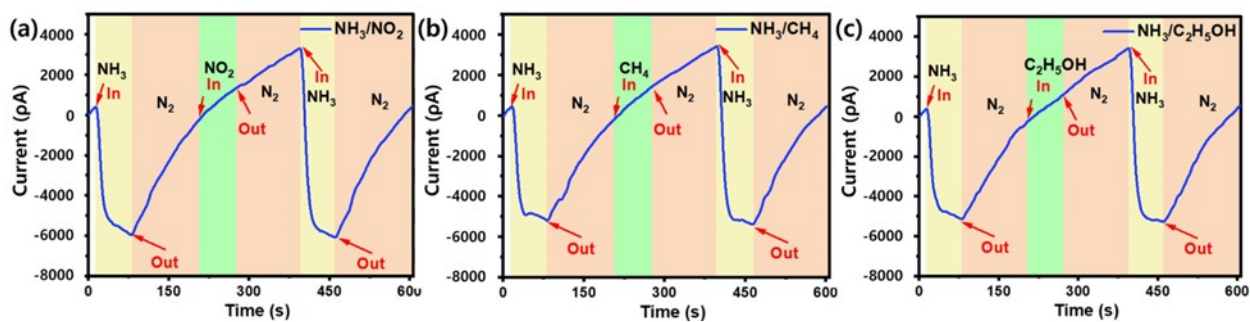

196

197 **Fig. S11a.** Cross reactivity analysis for BLE device integrated with fabricated sensor for different  
 198 gases (separately). (a) NO<sub>2</sub>. (b) CH<sub>4</sub>. (c) C<sub>2</sub>H<sub>5</sub>OH.

199 In presence of NO<sub>2</sub>, CH<sub>4</sub>, C<sub>2</sub>H<sub>5</sub>OH (Fig. S11a: a, b, c, respectively) gases no interference was  
 200 observed, which proves that sulfur-rich WS<sub>2</sub>/rGO nanohybrid is highly specific towards NH<sub>3</sub> gas.

201

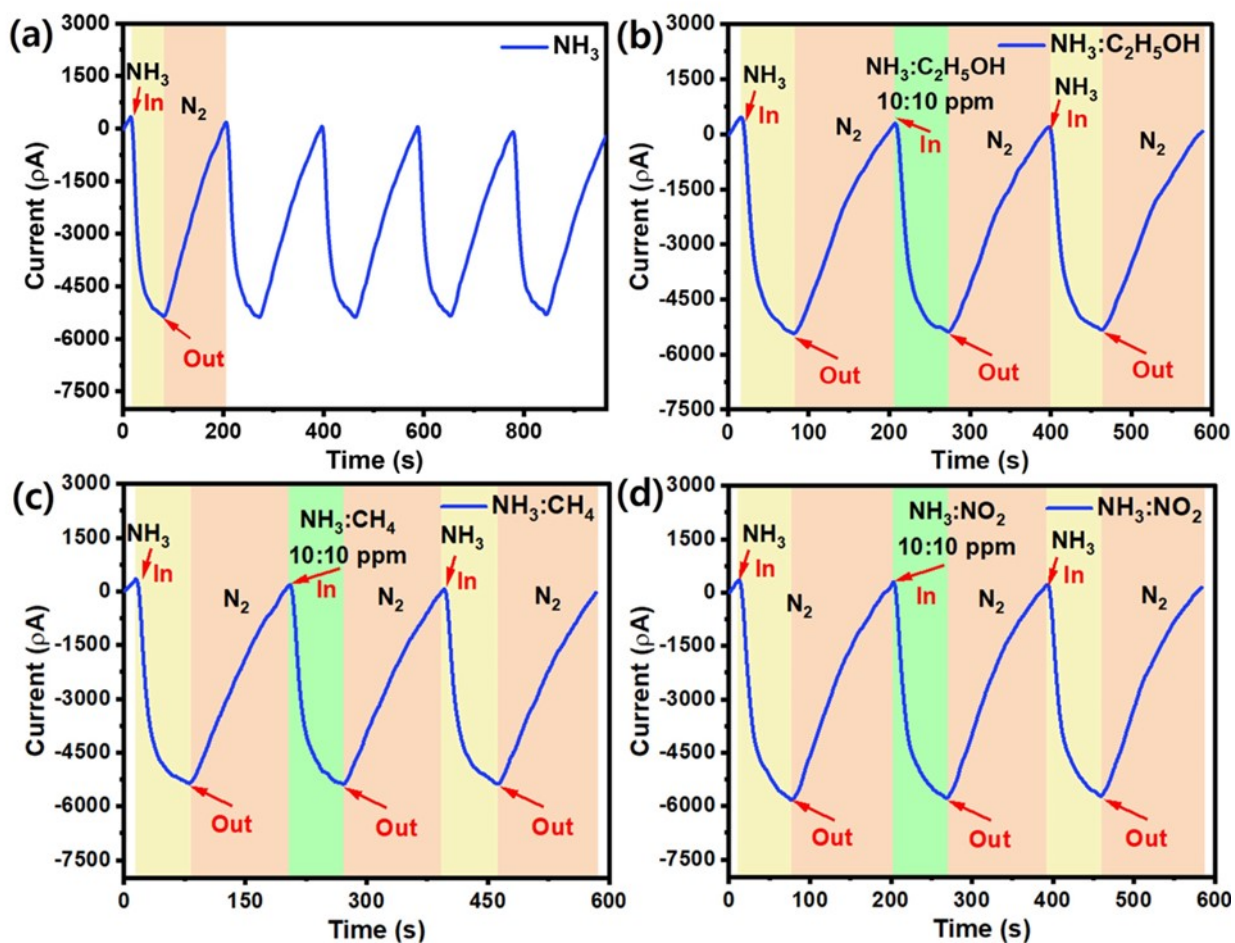

202

203 **Fig. S11b.** Cross reactivity analysis for BLE device integrated with fabricated sensor for different  
 204 gases (mixture). (a)  $\text{NH}_3$ . (b)  $\text{NH}_3:\text{C}_2\text{H}_5\text{OH}$ . (c)  $\text{NH}_3:\text{CH}_4$ . (d)  $\text{NH}_3:\text{NO}_2$ .

205 In presence of  $\text{NH}_3:\text{NO}_2$ ,  $\text{NH}_3:\text{CH}_4$ ,  $\text{NH}_3:\text{C}_2\text{H}_5\text{OH}$  (Fig. S11b: a, b, c, d, respectively) mixture of  
 206 gases no interference was observed, which again proves that sulfur-rich  $\text{WS}_2/\text{rGO}$  nanohybrid is  
 207 highly specific towards  $\text{NH}_3$  gas (Video S1).

208

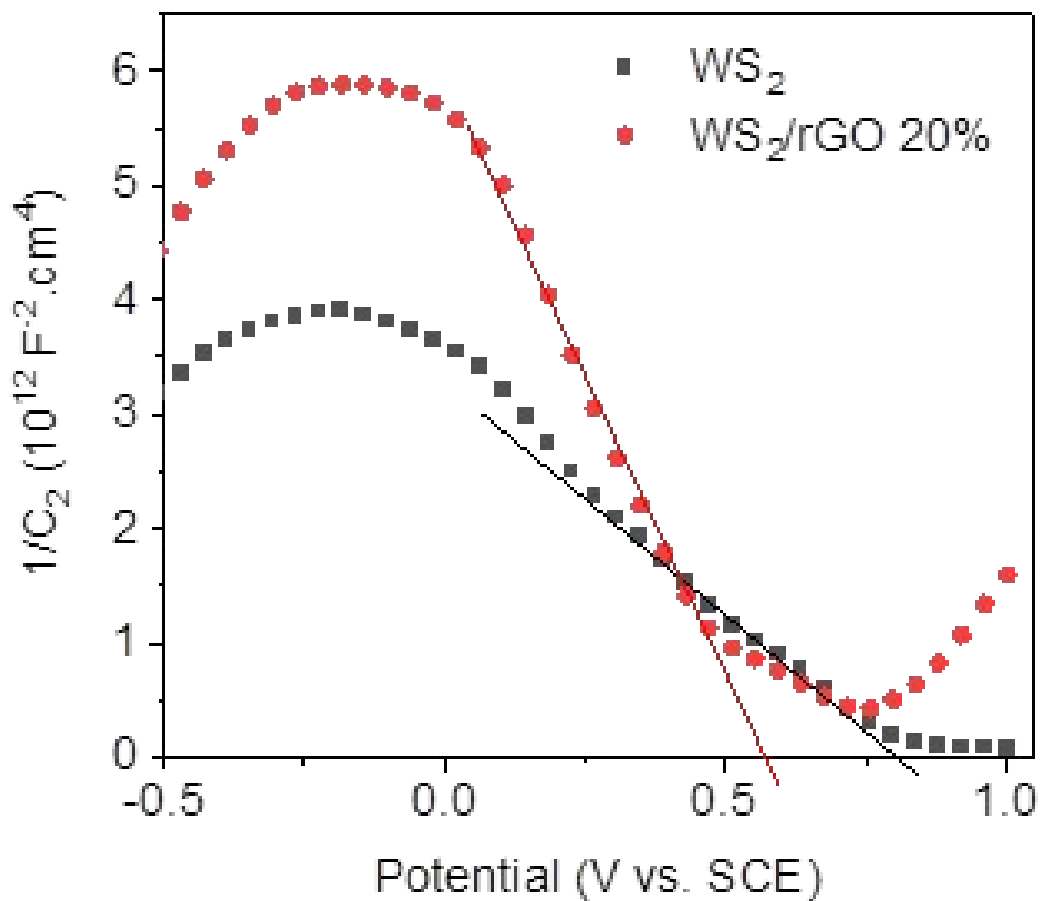

209

210 **Fig. S12.** Mott Schottky plot for all three samples rGO,  $\text{WS}_2$ ,  $\text{WS}_2/\text{rGO}$ .

211 M-S plot showed the p-type behavior of the semiconductor. Sulfur richness and nitrogen  
 212 environment played a crucial role in making  $\text{WS}_2$  and rGO as a p-type semiconductor as S and N  
 213 acted as acceptor and supported (enhanced) the interaction of  $\text{NH}_3$  electrons.

214

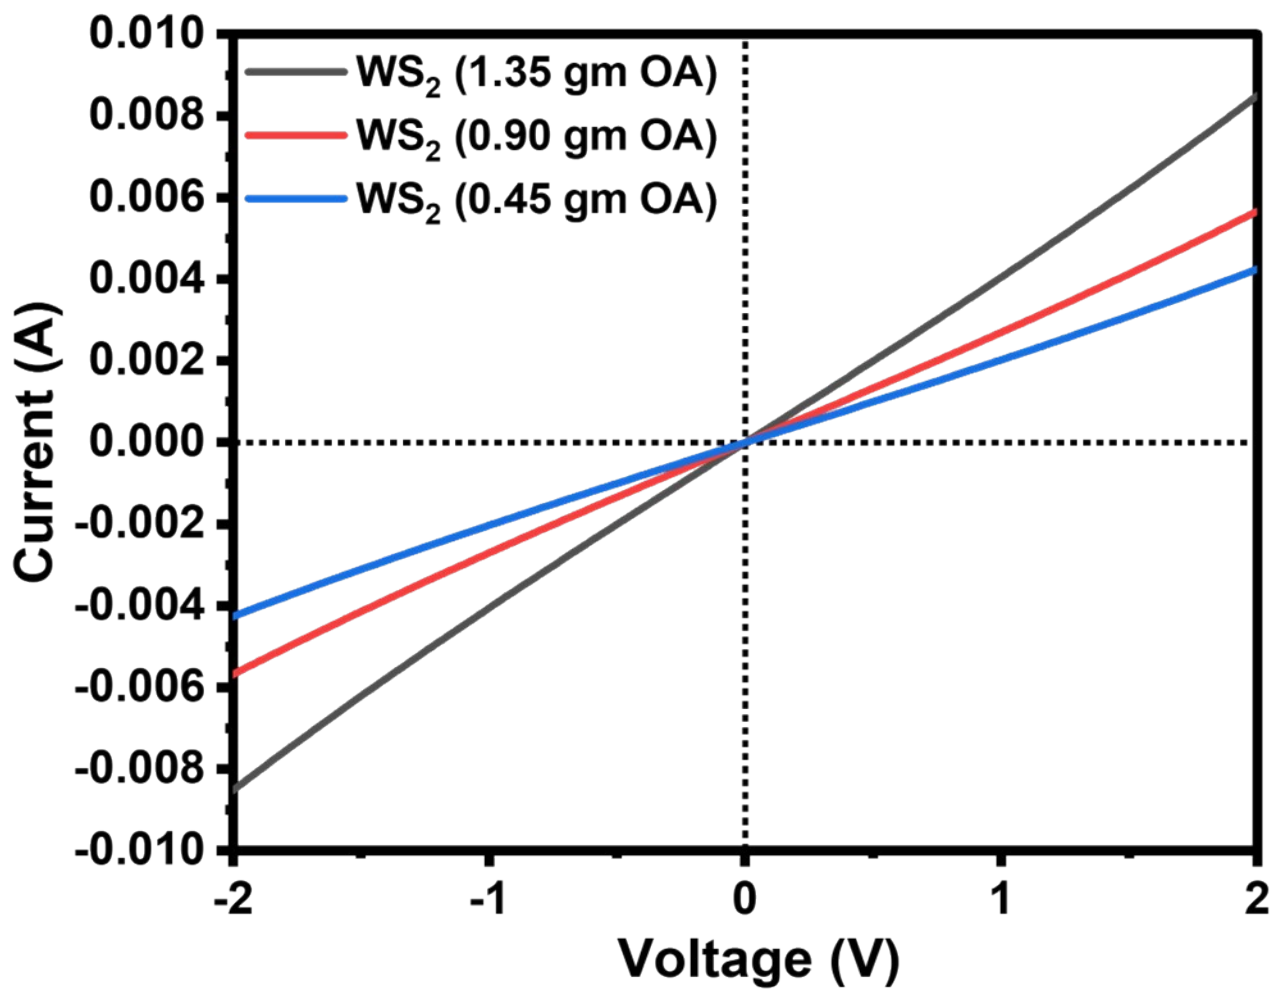

215

216 Fig. S13. I-V study for WS<sub>2</sub> with different OA content.

217

218 **Table S1. Ammonia ppm calculation for real time monitoring of meat freshness**

| <b>Standard concentration</b> |           | <b>Real-time monitoring</b> |            |                   |
|-------------------------------|-----------|-----------------------------|------------|-------------------|
| <b>PPM</b>                    | <b>R%</b> | <b>R%</b>                   | <b>PPM</b> | <b>Admissible</b> |
| 5                             | 80        | 85                          | 8.4        | o                 |
| 10                            | 89        | 118                         | 90         | o                 |
| 80                            | 115       | 135                         | 150        | x                 |
| 100                           | 120       | 247                         | 289        | x                 |

219

220

221 **Table S2. rGO content calculation for all four composites**

| <b>Content of rGO in WS<sub>2</sub>/rGO nanohybrid</b>               |                                 |                                          |                                          |                                          |                                          |
|----------------------------------------------------------------------|---------------------------------|------------------------------------------|------------------------------------------|------------------------------------------|------------------------------------------|
| rGO (40ml GO solution)                                               | WS <sub>2</sub> (40ml solution) | WS <sub>2</sub> /rGO 10% (40ml solution) | WS <sub>2</sub> /rGO 20% (40ml solution) | WS <sub>2</sub> /rGO 30% (40ml solution) | WS <sub>2</sub> /rGO 40% (40ml solution) |
| 250 mg                                                               | 350 mg                          | 62.5/350<br>Ratio: 18                    | 125/350<br>Ratio: 35                     | 187.5/350<br>Ratio: 53                   | 250/350<br>Ratio: 71                     |
| <b>XPS analysis for rGO content in WS<sub>2</sub>/rGO nanohybrid</b> |                                 |                                          |                                          |                                          |                                          |
| 85.91 %                                                              | 17.65 %                         | 19.52-17.65 % = 1.87 %                   | 24.24-17.65 % = 6.59 %                   | 29.35-17.65 % = 11.7 %                   | 32.7-17.65 % = 15.05 %                   |

222

223

224 **Table S3: Comparison of C, O, W, and S atomic % in all composites**

| <b>Composite</b>         | <b>C %</b> | <b>O %</b> | <b>W %</b> | <b>S %</b> |
|--------------------------|------------|------------|------------|------------|
| WS <sub>2</sub> /rGO 10% | 19.58      | 26.48      | 18.51      | 30.34      |
| WS <sub>2</sub> /rGO 20% | 21.24      | 13.68      | 19.94      | 43.17      |
| WS <sub>2</sub> /rGO 30% | 29.35      | 24.44      | 15.94      | 25.48      |
| WS <sub>2</sub> /rGO 40% | 32.7       | 23.64      | 14.58      | 26.15      |

225



227 **Video S1:** Working demonstration of BLE sensing device for  $\text{NH}_3:\text{C}_2\text{H}_5\text{OH}$  mixture in same  
228 cycles.

229

230

231

232 **References**

233 1 K. Choi, G. Jung, S. Hong, Y. Jeong, W. Shin, J. Park, C. Lee, D. Kim and J. H. Lee, *Int.*  
234 *Symp. Olfaction Electron. Nose, ISOEN 2022 - Proc.*, 2022, 1–4.

235 2 Y. Kim, T. Kim, Y. S. Choi, T. H. Lee, H. Park, S. A. Lee, H. G. Byun, B. H. Hong and H.  
236 W. Jang, *Sensors Actuators B Chem.*, 2021, 349.

237 3 Q. Feng, X. Li, J. Wang and A. M. Gaskov, *Sensors Actuators, B Chem.*, 2016, **222**, 864–  
238 870.

239 4 Y. C. Wang, *Introduction to the Semiconductor Process Technologies*, 2004.

240 5 Why Does Conductivity Increase With Temperature In Semiconductors?, [https://atlas-](https://atlas-scientific.com/blog/why-does-conductivity-increase-with-temperature-in-semiconductors/)  
241 [scientific.com/blog/why-does-conductivity-increase-with-temperature-in-semiconductors/](https://atlas-scientific.com/blog/why-does-conductivity-increase-with-temperature-in-semiconductors/).

242 6 G. S. Nolas and H. J. Goldsmid, *Therm. Conduct.*, 2006, 105–121.

243 7 D. Radisky, M. J. Bissell, K. Illmensee, M. J. Bissell, S. A. Ravani, M. J. Blaser, M. A.  
244 Peppercorn, B. Vogelstein and C. Eng, *Thermoelectricity in*, 2004, vol. 303.

245
